# Supplementary material for: A Paradoxical Vasodilatory Nutraceutical Intervention for Prevention and Attenuation of Migraine—A Hypothetical Review
Source: MDPI journal article supplement (doi:10.3390/nu12082487), 2020-08-18
Supplement: s1 [file s1]

# Supplementary Files

**Table S1.** Animal studies of L-arginine on vascular tone.

| <i>Study</i>        | <i>Animal</i> | <i>Dose</i> | <i>Mode of Administration</i> | <i>Treatment Frequency</i> | <i>Treatment Duration</i> | <i>Medical Condition</i>        | <i>Effect on Serum Measures (unless otherwise stated)</i>                                                                     |
|---------------------|---------------|-------------|-------------------------------|----------------------------|---------------------------|---------------------------------|-------------------------------------------------------------------------------------------------------------------------------|
| Javanmard 2009 [73] | Rabbit        | 3%          | P.o.                          | Dietary                    | 1 month                   | Hypercholesterolaemia           | Increased eNOS expression intensity in aorta                                                                                  |
| Howell 2009 [63]    | Rat           | 95 mM       | P.o.                          | Dietary                    | 2 weeks                   | Hypoxia                         | Maintained pulmonary arterial pressure, inhibited increased precapillary resistance, maintained decreased vascular resistance |
| Kharazmi 2015 [51]  | Rat           | 0.01 M      | Postmortem vascular infusion  | Single                     | 8 weeks                   | Diabetes                        | Increased GABA-induced vasodilatation in both diabetic and non-diabetic animals                                               |
| Mendrinis 2010 [52] | Minipig       | 30 µl 1 mM  | Intravitreal                  | Single                     | 30 mins.                  | Retinal vein occlusion          | Persistently increased arteriolar diameter                                                                                    |
| Morita 2014 [72]    | Rat, rabbit   | 2.85 mM/kg  | P.o.                          | Single                     | 4 hours                   | None                            | Increased blood NO <sub>x</sub> (nitrite + nitrate) and cGMP                                                                  |
| Ou 2010 [74]        | Rat           | 500 mg/kg   | I.p.                          | Once daily                 | 3, 5 weeks                | Pulmonary hypertension          | Decreased pulmonary artery wall thickness. Increased NO production, eNOS expression and phosphorylation                       |
| Saleh 2011 [105]    | Rabbit        | 2.25%       | P.o.                          | Dietary                    | 28 days                   | Hypercholesterolaemia           | Prevented aortic intimal thickening                                                                                           |
| Schreiber 2017 [62] | Rat           | 300 mg/kg   | P.o.                          | Once daily                 | 14 days                   | Pulmonary hypertension          | Decreased pulmonary artery pressure, increased vascular elasticity, palliated small vessel disease                            |
| Feng 2013 [61]      | Rat           | 3%          | P.o.                          | Dietary                    | 4 weeks                   | Insulin-resistance hypertension | Reversed vessel thickness, increased NO and cGMP back to non-hypertensive controls, decreased systolic blood pressure         |

Study first authors and years are listed with animals used, doses and modes of administration, treatment frequencies and durations, induced medical conditions of the subjects, and drug effects on serum measures. P.o. = per os; i.p. = intraperitoneal; eNOS = endothelial nitric-oxide synthase; GABA = gamma aminobutyric acid; cGMP = cyclic guanosine monophosphate; NO = nitric oxide.

**Table S2.** Human studies of L-arginine on vascular tone.

| <i>Study</i>               | <i>Registration No.</i> | <i>Dose (g) p.o.</i> | <i>Treatment Frequency</i>               | <i>Treatment Duration</i> | <i>Medical Condition</i>                           | <i>Effect on Serum Measures (unless otherwise stated)</i>                                                                 | <i>Adverse or Side Effects</i>                       |
|----------------------------|-------------------------|----------------------|------------------------------------------|---------------------------|----------------------------------------------------|---------------------------------------------------------------------------------------------------------------------------|------------------------------------------------------|
| Ast 2010 [69]              | NA                      | 2, 4                 | Thrice daily                             | 4 weeks                   | Primary hypertension                               | Decreased blood pressure with 12g daily (4g x3)                                                                           | None reported                                        |
| Camarena Pulido 2016 [67]  | NCT02363348             | 3                    | Once daily                               | 20 weeks                  | Risk of pre-eclampsia                              | Decreased cases of pre-eclampsia                                                                                          | Mild dyspepsia                                       |
| Chen 2010 [80]             | NA                      | 5.2                  | Once daily                               | 3 weeks                   | Old age                                            | Increased anaerobic threshold                                                                                             | None                                                 |
| Deveaux 2016 [53]          | NCT02354794             | 1.5                  | Thrice daily                             | 4 weeks                   | Overweight, cardiometabolic risk                   | In those with lower baseline L-arginine, attenuated decrease in flow-mediated dilatation                                  | None                                                 |
| Fahs 2009 [55]             | NA                      | 7                    | 4 times, before exercise, 72 hours apart | 16 days                   | None                                               | After exercise: Decreased brachial stiffness. Increased central aortic stiffness, reactive hyperaemia, forearm blood flow | None reported                                        |
| Jahangir 2009 [106]        | NA                      | 9                    | Once daily                               | 4 days                    | Coronary artery disease                            | Increased homocysteine:methionine ratio                                                                                   | None reported                                        |
| Lucotti 2009 [58]          | NCT00408577             | 6.4                  | Once daily                               | 6 months                  | Cardiovascular disease, after aortocoronary bypass | Decreased ADMA. Increased cGMP, L-arginine:ADMA ratio, reactive hyperaemia                                                | None                                                 |
| Morris 2013 [77]           | NCT01796678             | 0.1/kg               | Thrice daily                             | 5 days                    | Sickle cell disease                                | Decreased vaso-occlusive pain score                                                                                       | None                                                 |
| Neri 2010 [70]             | NCT00974714             | 4                    | Once daily                               | 12 weeks                  | Pregnant, chronic mild hypertension                | No change in blood pressure, but fewer received anti-hypertensives                                                        | None reported                                        |
| Orozco-Gutiérrez 2010 [50] | NA                      | 4                    | Twice daily                              | 2 months                  | Heart failure                                      | Decreased pulmonary artery, diastolic and systolic artery pressures. Increased duration on treadmill                      | Gastrointestinal distress                            |
| Pahlavani 2017 [49]        | IRCT2013121515807N1     | 2                    | Once daily                               | 45 days                   | None                                               | Increased maximal oxygen uptake                                                                                           | Skin dermatitis, stomach problems                    |
| Siasos 2009 [54]           | NA                      | 7                    | Thrice daily                             | 3 days                    | Smoking                                            | Increased flow-mediated dilatation. Decreased carotid-femoral pulse wave velocity                                         | None reported                                        |
| Vadillo-Ortega 2011 [68]   | NCT00469846             | 3.3                  | Twice daily                              | 19 weeks                  | Risk of pre-eclampsia                              | With antioxidant vitamins: Decreased pre-eclampsia incidence                                                              | Nausea, dyspepsia, dizziness, palpitations, headache |

Study first authors and years are listed with clinical trial registration numbers, oral doses in grams, treatment frequencies and durations, existing medical conditions of the subjects, drug effects on serum measures and adverse/side effects reported. "None reported" = study did not mention adverse/side effects; "none" = there were no adverse/side effects from the treatment; p.o. = per os; NA = not available.

**Table S3.** Animal studies of AGE on vascular tone.

| <i>Study</i>             | <i>Animal</i> | <i>Dose</i> | <i>Mode of Administration</i> | <i>Treatment Frequency</i>                               | <i>Treatment Duration</i>            | <i>Medical Condition</i>                                | <i>Effect on Serum Measures (unless otherwise stated)</i>                                                                  |
|--------------------------|---------------|-------------|-------------------------------|----------------------------------------------------------|--------------------------------------|---------------------------------------------------------|----------------------------------------------------------------------------------------------------------------------------|
| Aguilera 2010 [86]       | Rat           | 1.2 ml/kg   | I.p.                          | 30 mins. before, at onset of, or 1 hr. after reperfusion | 2 hrs. infarct, 4 hrs. reperfusion   | Middle cerebral artery occlusion causing focal ischemia | Onset of reperfusion: Decreased 2-hr. infarct area                                                                         |
| Cemil 2016 [107]         | Rat           | 250 mg/kg   | P.o.                          | Once daily                                               | 15 days                              | CNS injury                                              | CNS tissue: Decreased ischaemia                                                                                            |
| Colin-Gonzalez 2011 [87] | Rat           | 1.2 ml/kg   | I.p.                          | Single (reperfusion onset)                               | 1 hour infarct, 24 hours reperfusion | Middle cerebral artery occlusion causing focal ischemia | After 1 hr. ischaemia, 24 hrs. reperfusion: Decreased infarct area                                                         |
| Perez-Torres 2016 [85]   | Rat           | 125 mg/kg   | I.a.                          | Twice daily                                              | 1 month                              | Metabolic syndrome                                      | Decreased systolic blood pressure and coronary vascular resistance. Increased vascular function, heart NO, citrulline, NOx |

Study first authors and years are listed with animals used, doses and modes of administration, treatment frequencies and durations, induced medical conditions of the subjects, and drug effects on serum measures. I.p. = intraperitoneal; p.o. = per os; i.a. = intra-abdominal; CNS = central nervous system.

**Table S4.** Human studies of AGE on vascular tone. .

| <i>Study</i>       | <i>Registration No.</i> | <i>Dose (g) p.o.</i> | <i>Treatment Frequency</i> | <i>Treatment Duration</i> | <i>Medical Condition</i>   | <i>Effect on Serum Measures (unless otherwise stated)</i>                                                                                                                           | <i>Adverse or Side Effects</i>                                                                                 |
|--------------------|-------------------------|----------------------|----------------------------|---------------------------|----------------------------|-------------------------------------------------------------------------------------------------------------------------------------------------------------------------------------|----------------------------------------------------------------------------------------------------------------|
| Ahmad i 2013 [90]  | NA                      | 0.25                 | Once daily                 | 1 year                    | Medium cardiovascular risk | Decreased homocysteine. Increased temperature rebound                                                                                                                               | None reported                                                                                                  |
| Budoff 2009 [83]   | NCT01534910             | 0.25                 | Once daily                 | 1 year                    | Medium cardiovascular risk | With supplements including 0.1g L-arginine: Decreased homocysteine. Increased temperature rebound                                                                                   | None reported                                                                                                  |
| Larijani 2013 [91] | NCT00860847             | 0.3                  | Every 3 months             | 1 year                    | None                       | With 30 mg CoQ10: Improved pulse-wave velocity and digital thermal monitoring                                                                                                       | None reported                                                                                                  |
| Ried 2010 [92]     | ACTRN12609000151235     | 0.96                 | Once daily                 | 12 weeks                  | Systolic hypertension      | Containing 2.4 mg S-allyl-cysteine: In hypertensive patients, systolic blood pressure decreased. In normotensive patients, no change                                                | Belching, reflux, taste sensations                                                                             |
| Ried 2013 [94]     | ACTRN12611000581965     | 0.24, 0.48, 0.96     | Once daily                 | 12 weeks                  | Systolic hypertension      | Containing 0.6, 1.2, 2.4 mg S-allyl-cysteine: Decreased systolic blood pressure in patients taking 0.48g AGE (1.2g S-allyl-cysteine)                                                | Constipation, bloating, flatulence, reflux, garlic taste, difficulty swallowing the capsules, dry mouth, cough |
| Ried 2016 [48]     | ACTRN12613000747729     | 1.2                  | Once daily                 | 12 weeks                  | Hypertension               | Containing 1.2 mg S-allyl-cysteine: Improved central blood pressure, central pulse pressure, mean arterial pressure, augmentation pressure, pulse-wave velocity, arterial stiffness | Reflux, burping, bloating. No increased bleeding risk in patients on blood-thinning drugs. Improved digestion  |
| Reid 2018 [93]     | ACTRN12616000185460     | 1.2                  | Once daily                 | 12 weeks                  | Hypertension               | Containing 1.2 mg S-allyl-cysteine: Decreased mean, central and pulse blood pressures, arterial stiffness                                                                           | Garlic taste, burping                                                                                          |
| Seo 2012 [108]     | NA                      | 0.08                 | Once daily                 | 12 weeks                  | Postmenopausal             | Decreased homocysteine                                                                                                                                                              | None reported                                                                                                  |

Study first authors and years are listed with clinical trial registration numbers, oral doses in grams, treatment frequencies and durations, existing medical conditions of the subjects, drug effects on serum measures and adverse/side effects reported. "None reported" = study did not mention adverse/side effects; "none" = there were no adverse/side effects from the treatment; NA = not available.

**Table S5.** Currently commonly used approaches to treat migraines.

| Migraine Treatment      | Examples                                                               | Considerations                                                                                                                                                                                                                                                                                                                                                                                                                                                                                                                                                                                                                                                                                                                                                             |
|-------------------------|------------------------------------------------------------------------|----------------------------------------------------------------------------------------------------------------------------------------------------------------------------------------------------------------------------------------------------------------------------------------------------------------------------------------------------------------------------------------------------------------------------------------------------------------------------------------------------------------------------------------------------------------------------------------------------------------------------------------------------------------------------------------------------------------------------------------------------------------------------|
| Acute medication        | Analgesics [34, 35, 37, 109, 110]                                      |                                                                                                                                                                                                                                                                                                                                                                                                                                                                                                                                                                                                                                                                                                                                                                            |
|                         | Antiemetics [31, 37, 111, 112]                                         |                                                                                                                                                                                                                                                                                                                                                                                                                                                                                                                                                                                                                                                                                                                                                                            |
|                         | Barbiturates [35, 109, 110, 113, 114]                                  |                                                                                                                                                                                                                                                                                                                                                                                                                                                                                                                                                                                                                                                                                                                                                                            |
|                         | Bolutonium toxin and muscle relaxants [32, 109, 112, 114, 115]         | Can induce migraine chronicity/recurrence, contraindicated in pregnancy, adverse effects, tolerance and dependence, serotonin interaction effects, require multiple doses, expensive, contraindicated in valvular disorders, short-term efficacy, early migraine recurrence, contraindicated in bleeding disorders, contraindicated in asthma, contraindicated in urticaria, contraindicated in renal impairment, contraindicated in peptic ulcers or recent gastrointestinal bleeding, abuse, rebound headache, additional dietary and management requirements, contraindications with MAOIs or SSRIs, contraindicated in cardiovascular disorders, incomplete and inconsistent pain relief, inefficacy during aura/premonitory phase [34-37, 110, 111, 113-116, 120-123] |
|                         | CGRP receptor antagonists (gepants) [116]                              |                                                                                                                                                                                                                                                                                                                                                                                                                                                                                                                                                                                                                                                                                                                                                                            |
|                         | Ergot derivatives [34, 36, 37, 110-112, 114]                           |                                                                                                                                                                                                                                                                                                                                                                                                                                                                                                                                                                                                                                                                                                                                                                            |
|                         | Local anaesthetics [37]                                                |                                                                                                                                                                                                                                                                                                                                                                                                                                                                                                                                                                                                                                                                                                                                                                            |
|                         | NSAIDs [32, 35, 37, 109, 110, 112, 115, 117]                           |                                                                                                                                                                                                                                                                                                                                                                                                                                                                                                                                                                                                                                                                                                                                                                            |
|                         | Opioids/opiates [31, 34, 35, 109-111]                                  |                                                                                                                                                                                                                                                                                                                                                                                                                                                                                                                                                                                                                                                                                                                                                                            |
|                         | Selective serotonin reuptake inhibitors (SSRIs) [36, 117, 118]         |                                                                                                                                                                                                                                                                                                                                                                                                                                                                                                                                                                                                                                                                                                                                                                            |
|                         | Triptans [34-37, 110-112, 114, 116, 119]                               |                                                                                                                                                                                                                                                                                                                                                                                                                                                                                                                                                                                                                                                                                                                                                                            |
| Prophylactic medication | Alpha-2 agonists [112, 113]                                            |                                                                                                                                                                                                                                                                                                                                                                                                                                                                                                                                                                                                                                                                                                                                                                            |
|                         | Angiotensin antihypertensives [112, 114, 124]                          |                                                                                                                                                                                                                                                                                                                                                                                                                                                                                                                                                                                                                                                                                                                                                                            |
|                         | Anticonvulsants or antiepileptics [32, 36, 112, 114, 117, 124]         |                                                                                                                                                                                                                                                                                                                                                                                                                                                                                                                                                                                                                                                                                                                                                                            |
|                         | Beta blockers [36, 112, 114, 117, 124]                                 | Adverse effects, ineffective at low doses, contraindicated in pregnancy, expensive, contraindicated in diabetes, long time to take effect, contraindicated in myocardial conduction blockages, drug interactions, contraindicated in bleeding disorders, contraindicated in asthma, contraindicated in urticaria, contraindicated in renal impairment contraindicated in peptic ulcers or recent gastrointestinal bleeding, additional dietary and management requirements, contraindications with MAOIs, contraindicated in glaucoma, anticholinergic effects, contraindicated in epilepsy, contraindicated in acute heart-attack recovery [34-37, 111-115, 126-132]                                                                                                      |
|                         | Bolutonium toxin and muscle relaxants [32, 109, 112, 114, 115]         |                                                                                                                                                                                                                                                                                                                                                                                                                                                                                                                                                                                                                                                                                                                                                                            |
|                         | Calcium channel blockers [36, 114, 117, 125]                           |                                                                                                                                                                                                                                                                                                                                                                                                                                                                                                                                                                                                                                                                                                                                                                            |
|                         | Monoamine oxidase inhibitors (MAOIs) [36]                              |                                                                                                                                                                                                                                                                                                                                                                                                                                                                                                                                                                                                                                                                                                                                                                            |
|                         | NMDA receptor antagonists [115, 126]                                   |                                                                                                                                                                                                                                                                                                                                                                                                                                                                                                                                                                                                                                                                                                                                                                            |
|                         | NSAIDs [32, 35, 37, 109, 110, 112, 115, 117]                           |                                                                                                                                                                                                                                                                                                                                                                                                                                                                                                                                                                                                                                                                                                                                                                            |
|                         | Parenteral nonsteroidal agents and corticosteroids [37, 111, 112, 127] |                                                                                                                                                                                                                                                                                                                                                                                                                                                                                                                                                                                                                                                                                                                                                                            |
|                         | Selective norepinephrine reuptake                                      |                                                                                                                                                                                                                                                                                                                                                                                                                                                                                                                                                                                                                                                                                                                                                                            |

|                       |                                                                       |                                                                                                                                       |
|-----------------------|-----------------------------------------------------------------------|---------------------------------------------------------------------------------------------------------------------------------------|
|                       | inhibitors (SNRIs) [114]                                              |                                                                                                                                       |
|                       | Selective serotonin reuptake inhibitors (SSRIs) [36, 117, 118]        |                                                                                                                                       |
|                       | Serotonin antagonists [112, 113, 117]                                 |                                                                                                                                       |
|                       | Tricyclic antidepressants [32, 36, 109, 112, 114, 115, 117, 124, 128] |                                                                                                                                       |
| Acupuncture [133-141] | N/A                                                                   | Insufficient or conflicting evidence, ineffective, small effect size [133-135, 137, 138, 140]                                         |
|                       | Distraction technique [145]                                           |                                                                                                                                       |
|                       | Externally Focused Secular Meditation [142]                           |                                                                                                                                       |
|                       | Internally Focused Secular Meditation [142]                           |                                                                                                                                       |
| Meditation [142-146]  | Mindfulness [144, 146]                                                | No effect on pain sensitivity, ineffective, insufficient evidence, distraction insufficient, meditation practice takes time [142-146] |
|                       | Progressive Muscle Relaxation [142]                                   |                                                                                                                                       |
|                       | Spiritual Meditation [142]                                            |                                                                                                                                       |

Each treatment approach is listed alongside examples and their caveats. NSAID = non-steroidal anti-inflammatory drug; CGRP = calcitonin gene-related peptide.
